# Supplementary material for: Effect of heat treatment on boron impurity in Vycor. Part I. Near infrared spectra and ab initio calculations of the vibrations of model molecules for surface boranols
Source: Royal Society of Chemistry journal article supplement (doi:10.1039/a909397d), 2000-01-01
Supplement: Esi.doc [file Esi.doc]

**Electronic Supplementary Information for Article I**

**Figure A** Atom numbering in (F3SiO)2BOH and (F3SiO)2BOH molecules.

|  |  |
| --- | --- |

**Table A** Optimised equilibrium configuration calculated for the (F3SiO)2BOH molecule.a

| R2,1 | 1.3522 | R11,7 | 1.5838 | A3,6,8 | 109.75 | A4,7,13 | 111.01 | D7,4,2,3 | 19.90 |
| --- | --- | --- | --- | --- | --- | --- | --- | --- | --- |
| R3,2 | 1.3704 | R12,7 | 1.5878 | A3,6,9 | 110.32 | A11,7,13 | 108.18 | D8,6,3,2 | 119.53 |
| R4,2 | 1.3828 | R13,7 | 1.5813 | A8,6,9 | 107.91 | A12,7,13 | 109.81 | D9,6,3,2 | 0.76 |
| R5,1 | 0.9645 | A1,2,3 | 117.63 | A3,6,10 | 110.89 | D13,7,4,2 | -114.24 | D10,6,3,2 | -120.92 |
| R6,3 | 1.6123 | A1,2,4 | 119.99 | A8,6,10 | 108.24 | D3,2,1,5 | 181.72 | D11,7,4,2 | 126.80 |
| R7,4 | 1.6185 | A3,2,4 | 122.37 | A9,6,10 | 109.65 | D4,2,1,5 | 1.57 | D12,7,4,2 | 8.03 |
| R8,6 | 1.5831 | A2,1,5 | 112.32 | A4,7,11 | 108.81 | D6,3,2,1 | 209.20 | G4,2,1,3 | -0.15 |
| R9,6 | 1.5898 | A2,3,6 | 143.14 | A4,7,12 | 110.76 | D6,3,2,4 | 29.36 |  |  |
| R10,6 | 1.5814 | A2,4,7 | 140.40 | A11,7,12 | 108.16 | D7,4,2,1 | 200.06 |  |  |

a Rij: length of bond ij / Å. Aijk: angle between bonds ij and jk / degree. Dijkl: dihedral angle between planes ijk and jkl / degree. Gijkl: angle between bond ij and plane kjl / degree.

**Table B** Optimised equilibrium configuration calculated for the (F2BO)2BOH molecule.a

| R2,1 | 1.3521 | R9,6 | 1.3199 | A2,3,6 | 130.46 | A10,7,11 | 118.31 | D7,4,2,3 | 25.22 |
| --- | --- | --- | --- | --- | --- | --- | --- | --- | --- |
| R3,2 | 1.3856 | R10,7 | 1.3195 | A2,4,7 | 130.48 | D3,2,1,5 | 1.37 | D8,6,3,2 | 19.36 |
| R4,2 | 1.3747 | R11,7 | 1.3350 | A3,6,8 | 121.62 | D11,7,4,2 | 17.74 | D9,6,3,2 | -163.01 |
| R5,1 | 0.9646 | A1,2,3 | 119.85 | A3,6,9 | 119.91 | D4,2,1,5 | 181.25 | D10,7,4,2 | -164.21 |
| R6,3 | 1.3543 | A1,2,4 | 117.62 | A8,6,9 | 118.43 | D6,3,2,1 | -160.33 | G4,2,1,3 | 0.12 |
| R7,4 | 1.3509 | A3,2,4 | 122.53 | A4,7,10 | 120.28 | D6,3,2,4 | 19.80 |  |  |
| R8,6 | 1.3326 | A2,1,5 | 112.12 | A4,7,11 | 121.38 | D7,4,2,1 | -154.65 |  |  |

a Rij: length of bond ij / Å. Aijk: angle between bonds ij and jk / degree. Dijkl: dihedral angle between planes ijk and jkl / degree. Gijkl: angle between bond ij and plane kjl / degree.
